# Supplementary material
Source: publisher figshare collection journal article supplement (https://acs.figshare.com/ndownloader/files/26801810)
Supplement: Supplementary file 1 [file 26801810]

## Supporting information

### Graft Semi-Interpenetrating Polymer Network Phase Change Materials for Thermal Energy Storage

Nima Alizadeh<sup>1,3</sup>, Royall M. Broughton<sup>2,3</sup>, Maria L. Auad<sup>1,3\*</sup>

<sup>1</sup>Department of Chemical Engineering, Auburn University, US

<sup>2</sup>Department of Mechanical Engineering, Auburn University, US

<sup>3</sup>Center for Polymers and Advanced Composites, Auburn University, US

\*Corresponding author's E-mail address: [mla0001@auburn.edu](mailto:mla0001@auburn.edu)

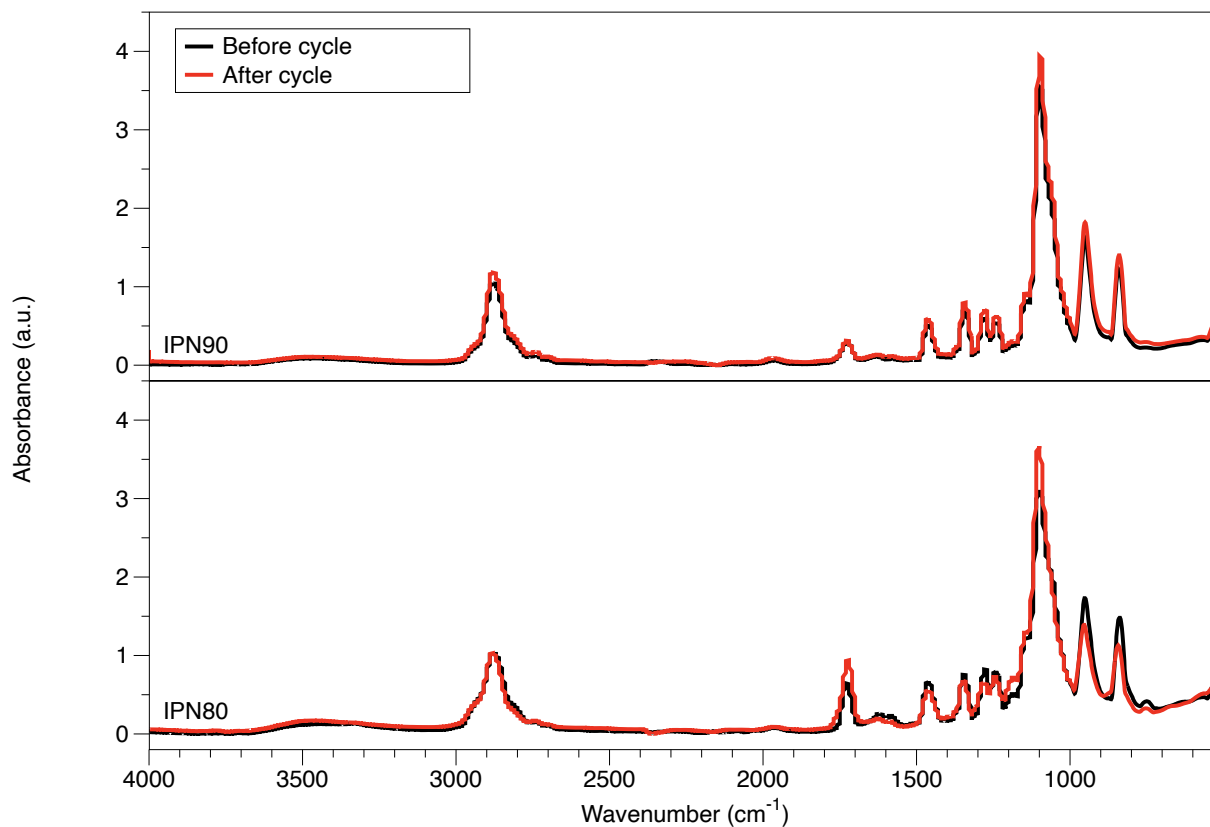

**Figure S1.** FTIR results of IPN90 and IPN80 before and after the thermal cycling test.

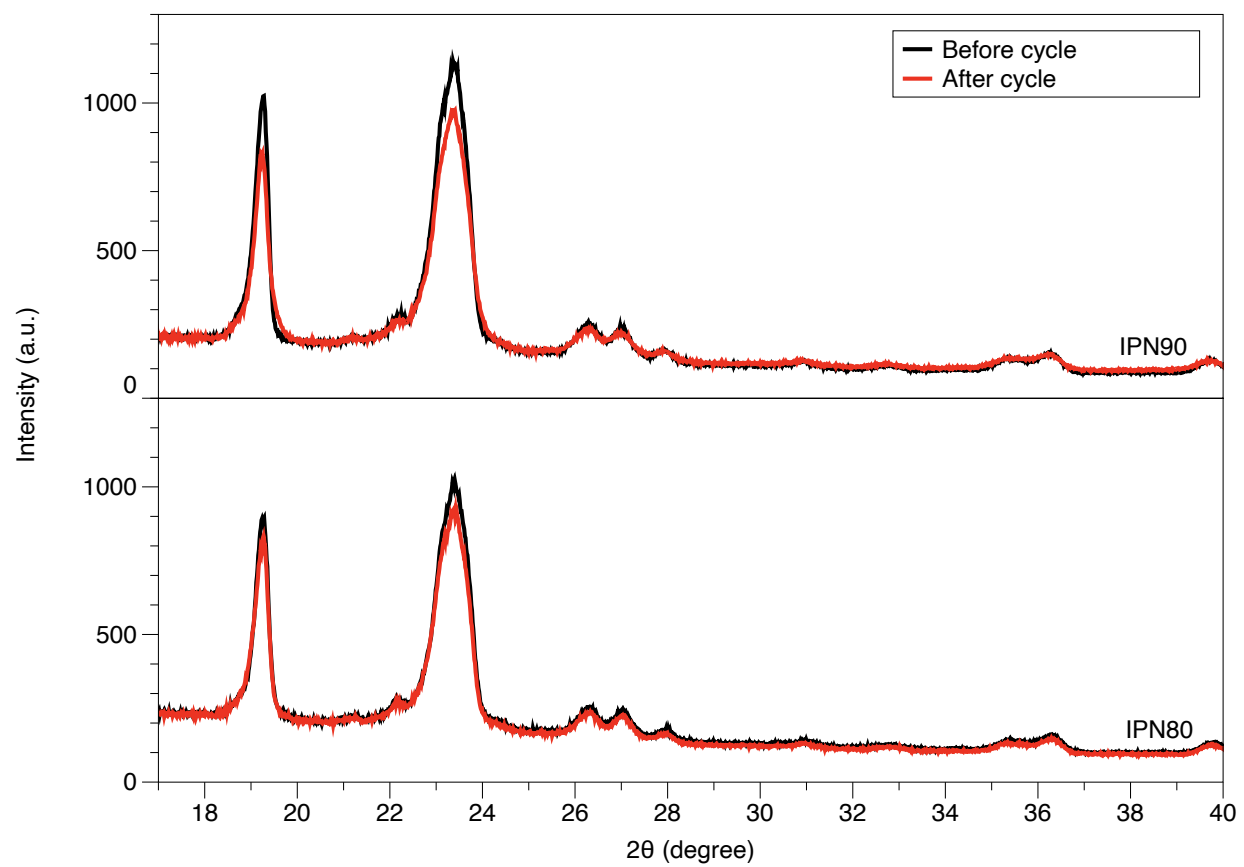

**Figure S2.** XRD curves of IPN90 and IPN80 before and after the thermal cycling test.
